# Supplementary material for: Anti-Inflammatory Effects of Neochlorogenic Acid Extract from Mulberry Leaf (Morus alba L.) Against LPS-Stimulated Inflammatory Response through Mediating the AMPK/Nrf2 Signaling Pathway in A549 Cells
Source: MDPI journal article supplement (doi:10.3390/molecules25061385), 2020-03-18
Supplement: s1 [file s1]

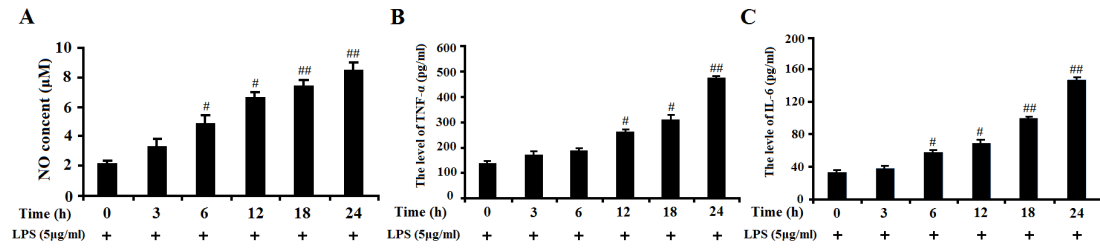

**Figure 1.** Effects of LPS on inflammatory responses in time-dependence in A549 cells. A549 cells were pretreated with LPS (5μg/mL) for 24h. A: The level of NO was measured in the culture medium by Griess reagents. B-C: The levels of TNF-α, IL-6 were detected in the culture medium by ELISA kits.
